# Supplementary material
Source: PubMed Central journal article supplement (PMC5916003)
Supplement: ba015008-suppl1.pdf [file ba015008-suppl1.pdf]

Online Supplemental figures and tables for:

## Red Pulp Macrophages in the Human Spleen are a Distinct Cell Population with a Unique Expression of Fc-gamma Receptors

S.Q. Nagelkerke, C.W. Bruggeman, J.M.M. den Haan, F.P.J. Mul, T.K. van den Berg, R. van Bruggen, T.W. Kuijpers

Figure S1

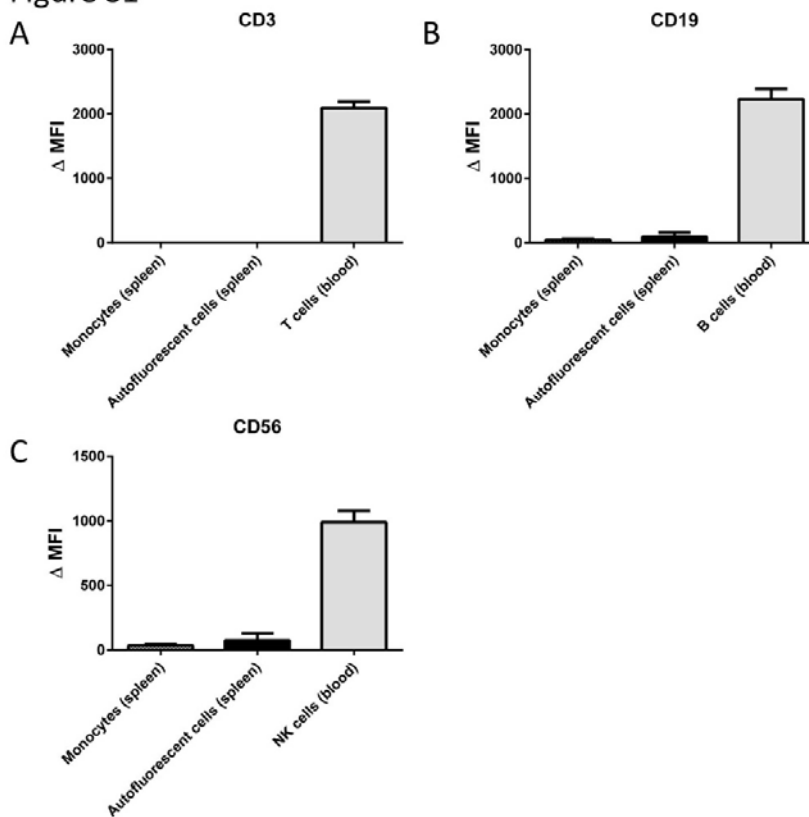

**Figure S1. Spleen autofluorescent cells are negative for canonical lymphocyte markers**

**A** CD3 staining on monocytes in the spleen (n=10), spleen autofluorescent cells (n=10), and circulating blood T cells (n=23). **B** CD19 staining on monocytes in the spleen (n=8), spleen autofluorescent cells (n=8), and circulating blood B cells (n=23). **C** CD56 staining on monocytes in the spleen (n=8), spleen autofluorescent cells (n=8), and circulating blood NK cells (n=23). MFI: median fluorescence intensity, Δ MFI: MFI corrected for staining with an isotype control. Means + s.e.m. are shown for each group.

Figure S2

Red Pulp M $\phi$  Fc $\gamma$ RIIb/c expression per genotype

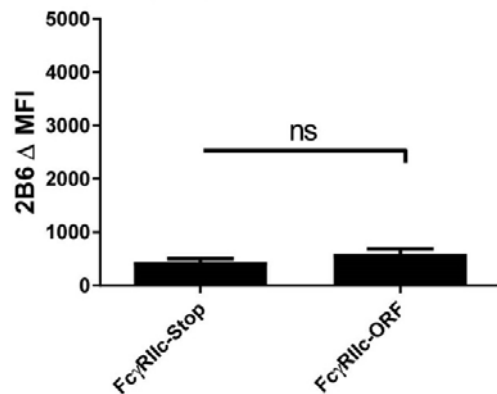

**Figure S2. No evidence of expression of Fc $\gamma$ RIIc on Red Pulp Macrophages**

Comparison of staining of MoAb 2B6, which detects the identical extracellular domain of both Fc $\gamma$ RIIb and Fc $\gamma$ RIIc, on red pulp macrophages. MoAb 2B6 recognizes an extracellular epitope of both Fc $\gamma$ RIIb and Fc $\gamma$ RIIc, but since *FCGR2C*-Stop individuals cannot express Fc $\gamma$ RIIc, the difference in MFI between *FCGR2C*-Stop and *FCGR2C*-ORF individuals can be assumed to derive from expression of Fc $\gamma$ RIIc. We compared 2B6 staining on red pulp macrophages of Fc $\gamma$ RIIc-Stop individuals (n=36) with individuals with 1 copy of Fc $\gamma$ RIIc-ORF (n=10).

Individuals that carried other genotypes that are known to result in ectopic Fc $\gamma$ RIIb expression, i.e. the 2B.4 promoter haplotype in *FCGR2B*<sup>1</sup> and/or a deletion of Copy Number Region 1 (CNR1, resulting in ectopic expression of Fc $\gamma$ RIIb on NK Cells)<sup>1,2</sup> were excluded from the analysis to avoid accidental positive staining of Fc $\gamma$ RIIb.

MFI: median fluorescence intensity,  $\Delta$  MFI: MFI corrected for staining with an isotype control. Statistics by unpaired t test. ns: non-significant. Means + s.e.m. are shown for each group.

Figure S3

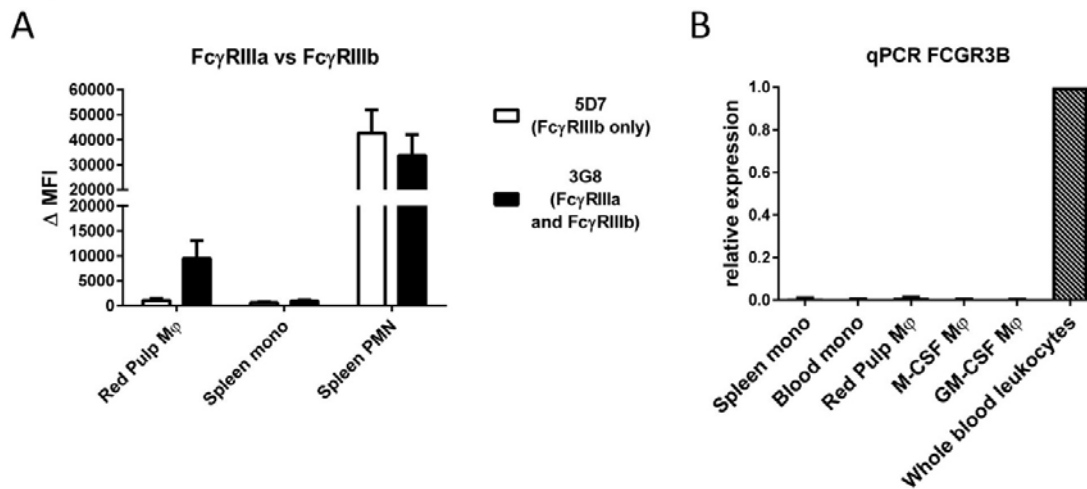

**Figure S3. Red Pulp Macrophages express FcγRIIIa, not FcγRIIIb**

**A** Staining with different MoAbs for FcγRIII. FcγRIIIb staining by MoAb 5D7 (also known as CLBgran11), which specifically binds FcγRIIIb (white bars), is compared to staining by MoAb 3G8 (black bars), which binds both FcγRIIIa and FcγRIIIb. Stainings are on monocytes in the spleen, Red Pulp Mφ and neutrophils in the same spleen. This shows that FcγRIIIb is not expressed on Red Pulp Mφ, and therefore FcγRIII expression on these cells must be FcγRIIIa, for which no specific MoAbs exist. MFI: median fluorescence intensity,  $\Delta$  MFI: MFI corrected for staining with an isotype control. Means + s.e.m. of n=7 are shown for each group. **B** quantitative mRNA analysis of the FCGR3B transcript encoding FcγRIIIb, which is expressed in high numbers by neutrophils. The relative expression compared with the expression in pooled whole blood leukocytes, corrected for housekeeping genes, is shown. The reference value of 1 for pooled whole blood leukocytes is shown as a positive control. Means + s.e.m. of n=3 are shown for each group.

Figure S4

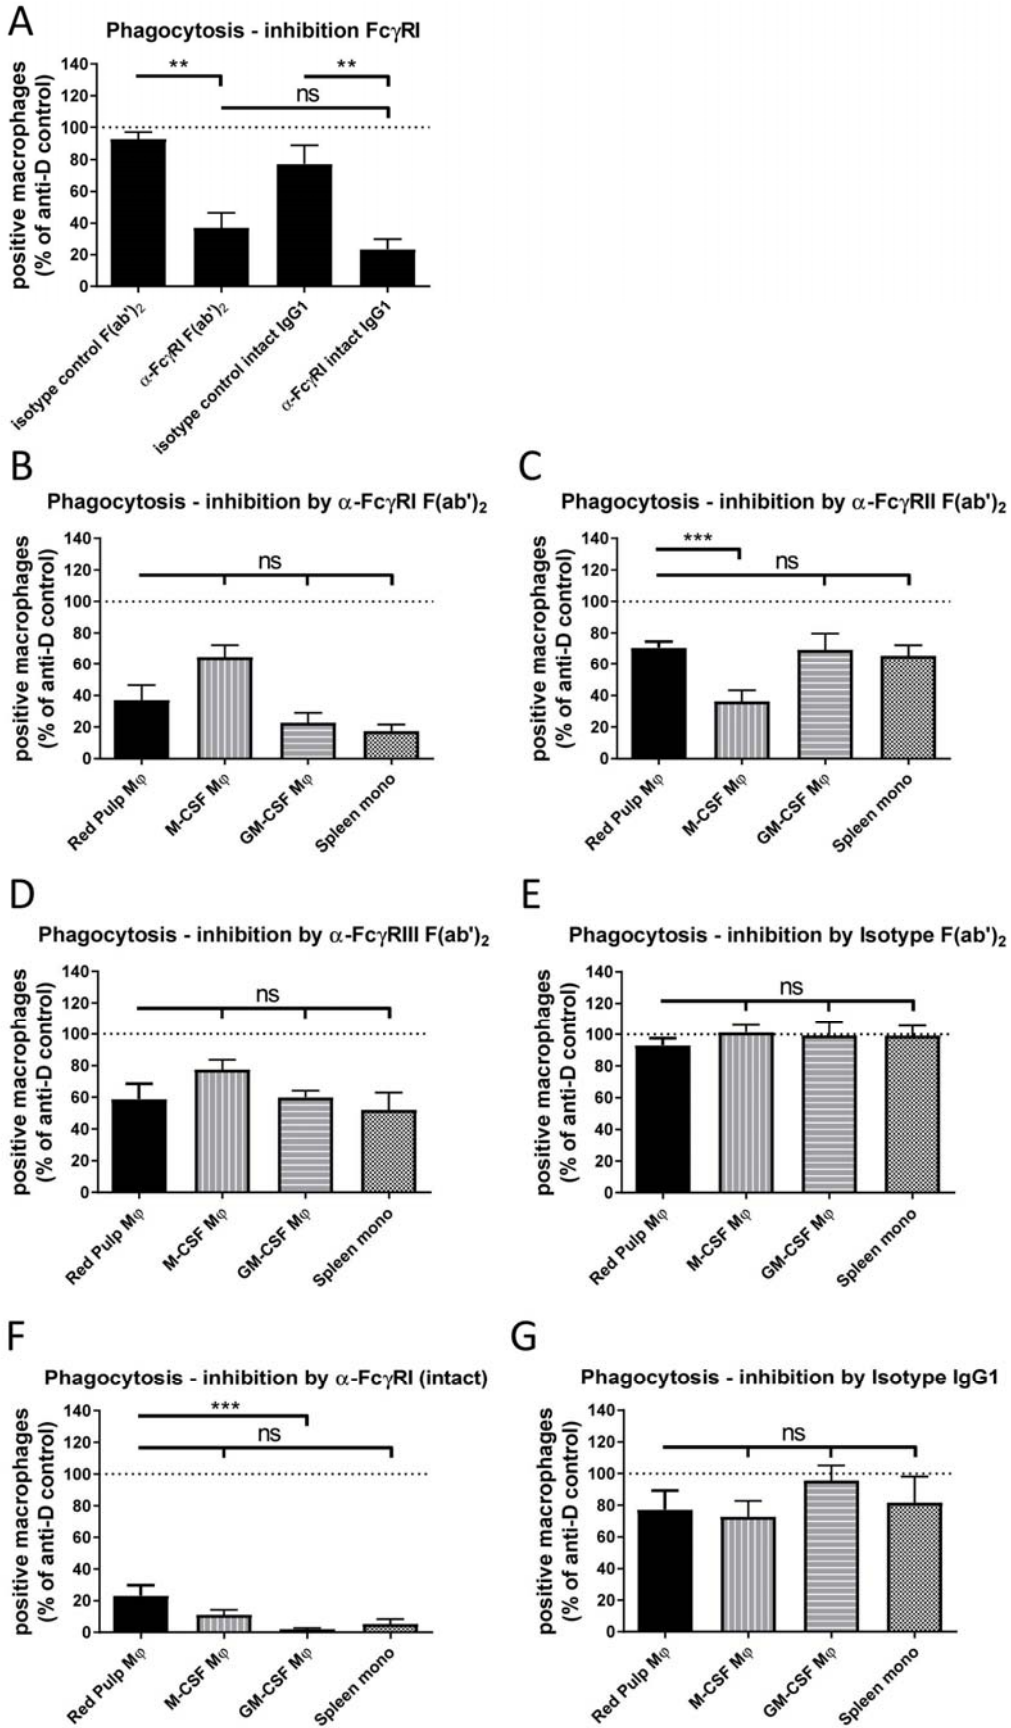

**Figure S4. Comparison of FcγR usage between different types of macrophages**

**A** comparison of F(ab')<sub>2</sub> fragments and intact IgG of MoAb 10.1 (blocking FcγRI) on phagocytosis of anti-D opsonized erythrocytes by red pulp macrophages. Isotype control F(ab')<sub>2</sub> n=9, 10.1 F(ab')<sub>2</sub> n=3, isotype control intact mouse IgG1 n=6, intact 10.1 n=7.

**B-G** comparison of different cell types for inhibition of phagocytosis by specific monoclonal antibodies against FcγRs. **B** comparison of α-FcγRI F(ab')<sub>2</sub> fragments; red pulp Mφ n=3, spleen monocytes n=2, M-CSF Mφ n=8, GM-CSF Mφ n=6.

**C** comparison of α-FcγRII F(ab')<sub>2</sub> fragments; red pulp macrophages n=10, spleen monocytes n=8, M-CSF Mφ n=12, GM-CSF Mφ n=8.

**D** comparison of α-FcγRIII F(ab')<sub>2</sub> fragments; red pulp macrophages n=10, spleen monocytes n=8, M-CSF Mφ n=8, GM-CSF Mφ n=6.

**E** comparison of isotype control F(ab')<sub>2</sub> fragments; red pulp macrophages n=9, spleen monocytes n=7, M-CSF Mφ n=9, GM-CSF Mφ n=9.

**F** comparison of α-FcγRI intact IgG; red pulp macrophages n=7, spleen monocytes n=5, M-CSF Mφ n=17, GM-CSF Mφ n=15.

**G** comparison of isotype control intact IgG; red pulp macrophages n=6, spleen monocytes n=4, M-CSF Mφ n=7, GM-CSF Mφ n=7.

Data are normalized against phagocytosis by unblocked macrophages.

Means + s.e.m. are shown for each group.

**Table S1. List of Monoclonal antibodies**

| Antigen   | Label     | Isotype                             | Clone                   | Manufacturer                                                           | Use    |
|-----------|-----------|-------------------------------------|-------------------------|------------------------------------------------------------------------|--------|
| CD3       | PE-Cy7    | Mouse IgG1                          | SK7                     | BD Pharmingen                                                          | FC     |
| CD11a     | FITC      | Mouse IgG2a                         | CLB-LFA-1/2<br>(TB133)  | PeliCluster                                                            | FC     |
| CD11b     | FITC      | Mouse IgM                           | CLB-mon-<br>gran/1 (B2) | PeliCluster                                                            | FC     |
| CD11c     | PE        | Mouse IgG2b                         | S-HCL-3                 | BD Biosciences                                                         | FC     |
| CD14      | PE-Cy7    | Mouse IgG2a                         | M5E2                    | BD Pharmingen                                                          | FC     |
| CD16a,b   | FITC      | Mouse IgG1                          | 3G8                     | BD Pharmingen                                                          | FC     |
| CD16a,b   | AF647     | Mouse IgG1                          | 3G8                     | BioLegend                                                              | IF     |
| CD16b     | Unstained | Mouse IgG2a                         | 5D7<br>(CLBgran11)      | a generous gift<br>from Marion<br>Kleijer, Sanquin,<br>the Netherlands | FC     |
| CD18      | FITC      | Mouse IgG1                          | L130                    | BD BioSciences                                                         | FC     |
| CD19      | APC       | Mouse IgG1                          | HIB19                   | BD Pharmingen                                                          | FC     |
| CD19      | AF488     | Mouse IgG1                          | HIB19                   | BioLegend                                                              | IF     |
| CD32a,b,c | FITC      | Mouse IgG1                          | AT10                    | AbD Serotec                                                            | FC     |
| CD32a,b,c | AF647     | Mouse IgG1                          | AT10                    | BioLegend                                                              | IF     |
| CD32a     | FITC      | Mouse IgG2b                         | IV.3                    | Stem Cell                                                              | FC     |
| CD32b,c   | AF488     | Humanized<br>IgG, N297Q<br>mutation | 2B6                     | a generous gift<br>from<br>MacroGenics,<br>Rockville, MD               | FC, IF |
| CD33      | PE        | Mouse IgG1                          | WM53                    | BD Pharmingen                                                          | FC     |
| CD36      | FITC      | Mouse IgG1                          | CLB-IVC7                | PeliCluster                                                            | FC     |
| CD56      | APC       | Mouse IgG1                          | B159                    | BD Pharmingen                                                          | FC     |
| CD64      | FITC      | Mouse IgG1                          | 10.1                    | BD Pharmingen                                                          | FC     |
| CD64      | AF647     | Mouse IgG1                          | 10.1                    | BioLegend                                                              | IF     |
| CD68      | PE        | Mouse IgG2b                         | Y1/82A                  | BD Pharmingen                                                          | FC     |
| CD89      | FITC      | Mouse IgG1                          | MIP8a                   | Novus Biologicals                                                      | FC     |
| CD163     | PE        | Mouse IgG1                          | MAC2-158                | Trillium                                                               | FC, IF |

|           |           |                                         |            |                   |        |
|-----------|-----------|-----------------------------------------|------------|-------------------|--------|
| CD169     | PE        | Mouse IgG1                              | 7-239      | BioLegend         | FC, IF |
| CD200R    | AF647     | Mouse IgG1                              | OX108      | AbD Serotec       | FC     |
| HLA-DR    | FITC      | Mouse IgG2a                             | G46-6      | BD Biosciences    | FC     |
| gp91PHOX  | FITC      | Mouse IgG1                              | 7D5        | MBL               | FC     |
| TLR4      | APC       | Mouse IgG2a                             | HTA125     | eBioscience       | FC     |
| IgG       | AF647     | Goat anti human IgG                     | Polyclonal | Life Technologies | FC     |
| Isotype   | FITC      | Mouse IgG1                              | CLB-203    | PeliCluster       | FC     |
| Isotype   | PE        | Mouse IgG1                              | CLB-203    | PeliCluster       | FC     |
| Isotype   | FITC      | Mouse IgG2a                             | CLB-713    | PeliCluster       | FC     |
| Isotype   | PE-Cy7    | Mouse IgG2a                             | ICIGG2A    | Abcam             | FC     |
| Isotype   | FITC      | Mouse IgG2b                             | B-Z40      | Diaclone          | FC     |
| Isotype   | PE        | Mouse IgG2b                             | 27-35      | BD Pharmingen     | FC     |
| Isotype   | APC       | Mouse IgG1                              | MOPC-21    | BD Pharmingen     | FC     |
| Isotype   | Unstained | Mouse IgG2a                             | 713        | PeliCluster       | FC     |
| conjugate | AF633     | F(ab') <sub>2</sub> Goat anti mouse IgG | Polyclonal | Invitrogen        | FC     |

FC: flow cytometry, IF: immunofluorescence

**Table S2.** Primers used in RT-qPCR analysis

| Transcript | Primers        | Sequence                          | Product size |
|------------|----------------|-----------------------------------|--------------|
| GUS        | Forward primer | 5'-GAAAATATGTGGTTGGAGAGCTCATT-3'  | 100 bp       |
|            | Reverse primer | 5'-CCGAGTGAAGATCCCCTTTTAA-3'      |              |
| GAPDH      | Forward primer | 5'-TGCACCACCAACTGCTTAGC-3'        | 87 bp        |
|            | Reverse primer | 5'-GGCATGGACTGTGGTCATGAG-3'       |              |
| FCGR1A1    | Forward primer | 5'-CTCCATCTGCCTGGGAGCAGCTCT-3'    | 437 bp       |
|            | Reverse primer | 5'-GCTGGAAATAGCTCTTTCACCGTGACA-3' |              |
| FCGR2A     | Forward primer | 5'-ATCATTGTGGCTGTGGTCATTGC-3'     | 275 bp       |
|            | Reverse primer | 5'-TCAGGTAGATGTTTTATCATCG-3'      |              |
| FCGR2B2    | Forward primer | 5'-GGAAAAAGCGCATTTGAGCCAATC-3'    | 193 bp       |
|            | Reverse primer | 5'-GGAAATACGAGATCTCCCTCTCTG-3'    |              |
| FCGR3A     | Forward primer | 5'-CACATATTTACAGAATGGCACAGG-3'    | 170 bp       |
|            | Reverse primer | 5'-ACACTGCCAAACCTTGAGTGATGG-3' *  |              |
| FCGR3B     | Forward primer | 5'-CACATATTTACAGAATGGCAAGGA-3'    | 170 bp       |
|            | Reverse primer | 5'-ACACTGCCAAACCTTGAGTGATGG-3' *  |              |

\* The same reverse primer is used for FCGR3A and FCGR3B, specificity derives from the forward primer

#### Supplemental Reference List

1. Tsang-A-Sjoe MWP, Nagelkerke SQ, Bultink IE et al. Fc-gamma receptor polymorphisms differentially influence susceptibility to systemic lupus erythematosus and lupus nephritis. *Rheumatology (Oxford)* 2016;55:939-948.
2. van der Heijden J, Breunis WB, Geissler J et al. Phenotypic variation in IgG receptors by nonclassical FCGR2C alleles. *J.Immunol.* 2012;188:1318-1324.
